# Supplementary material for: And then there were many: insights from the tangled taxonomy of the Antarctic brittle star Ophioplinthus gelida (Echinodermata: Ophiuroidea)
Source: Frontiers journal article supplement (doi:10.3389/fmars.2025.1615695), 2025-07-29
Supplement: Table_1.xlsx [file Table_1.xlsx]

## Sheet: Sheet1
Ship	Cruise ID	Region	Sample Gear	Number of stations
RRS James Clark Ross	JR144	Scotia Arc	Agassis Trawl	38
RRS James Clark Ross	JR144	Scotia Arc	Epibenthic Sled	29
RRS James Clark Ross	JR179	Amundsen Sea	Agassis Trawl	41
RRS James Clark Ross	JR179	Amundsen Sea	Epibenthic Sled	36
RRS James Clark Ross	JR230	West Antarctic Peninsula	Agassis Trawl	39
RRS James Clark Ross	JR230	West Antarctic Peninsula	Epibenthic Sled	12
RRS James Clark Ross	JR262	South Georgia	Agassis Trawl	88
RRS James Clark Ross	JR275	Weddell Sea	Agassis Trawl	56
RRS James Clark Ross	JR275	Weddell Sea	Epibenthic Sled	17
FS Polarstern	PS77	Scotia Arc, Weddell Sea	Agassis Trawl	21
FS Polarstern	PS77	Scotia Arc, Weddell Sea	Bottom Trawl	22
FS Polarstern	PS82	Weddell Sea	Agassis Trawl	17
FS Polarstern	PS82	Weddell Sea	Bottom Trawl	23
Academic Treshnikov	ACE	Circum Antarctic	miniAgassis Trawl	63
				502
