# Supplementary material for: And then there were many: insights from the tangled taxonomy of the Antarctic brittle star Ophioplinthus gelida (Echinodermata: Ophiuroidea)
Source: Frontiers journal article supplement (doi:10.3389/fmars.2025.1615695), 2025-07-29
Supplement: Table_2.xlsx [file Table_2.xlsx]

## Sheet: Sheet1
Ophioplinthus type specimens examined
Species	Authority	Date	Accession No	Type of type	Type Location	Location of Type material	Image	Physical	Date examined by CJS	Examined material	Thanks To
abyssorum	Lyman	1883	MCZ IZ OPH-532	Holotype	Challenger St 140: South of Capetown, South Atlantic	Museum of Comparative Zoology, Harvard	Y	N	2024-05-13	Images
accomodata	Koehler	1922	F305641 Museum Victoria	None	Ile Marie (Maria Island?	Australia Museum, Sydney	Y	N	2024-05-17	Images	Koehler 1922 Plate 84 fig 7-11, 17.
anceps	Koehler	1908	USNM 1014081		Eastern Weddell Sea 71°22'S 16°34'W	Smithsonian Institute NMNH	Y	N	2024-07-23	Images
banzarei	Madsen	1967	SAMA K1207	Holotype	Off Enderby Land 65° 12'S 53° 15'E	South Australian Museum	Y	N	2024-07-23	Images	Shirly Sorokin
brevirima	Mortensen	1936	NHMUK 136.12.20.1167-1175 (2specimens), 1936.12.30.1154-1165 (4 specimens), 1936.12.30.1166 (1 specimen)	syntypes	South Shetlands and Elephant Island	Natural History Museum London	Y	Y	2024-08-20	Specimens	Hugh Carter
brucei	Koehler	1908	NHMUK 1912.11.11.27-28	syntypes	Weddell Sea 66° 40'S 40° 35'W	Natural History Museum London	Y	Y	2024-08-20	Specimens	Hugh Carter
carinata	Studer	1876	MCZ IZ OPH-578	syntypes	NW Kerguelen Island	Museum of Comparative Zoology, Harvard	Y	N		Images
clasta	Clark	1911		Holotype	East Japan		N	N		Clark 1911 Figure 16.
confragossa	Lyman	1878	NHMUK 82.12.23.51	syntypes	Challenger St320 Rio La Plata, off Argentina	Natural History Museum London	Y	Y		Images
divisa	Lüken & Mortensen	1899					N	N		Luken Mortensen 1899 Plates 4 & 5
frigida	Koehler	1901	RBINS INV-OTH OPH.515	syntypes	Belgicae St 369 71° 3'S 88W Belingshausen Sea	Royal Belgian Institute of Natural Sciences	Y	N		Images
gelida	Koehler	1901	RBINS INV-OTH OPH.519 (syntypes 516-518)	Holotype	Belgicae St 412 71° 15'S 87° 39'W Belingshausen Sea	Royal Belgian Institute of Natural Sciences	Y	N		Images	Yves Samyn
glypta	HL Clark	1939	NHMUK 1948.5.26.361	Holotype	Maldives	Natural History Museum London	Y	Y	2024-08-20	Specimens	Hugh Carter
granulifera	Bernasconi & D'Agostino	1973		Holotype	65° 11'S 64° 10'W South of Lamaire Channel		N	N		Figure in Bernasconi & D'Agostino 1973
grisea	Lyman	1878	NHMUK 82.12.23.380	syntypes	Challenger St 156 62° 26'S 65° 44'E SW Kerguelen Plateau, Abyssal	Natural History Museum London	Y	Y		Specimens	Hugh Carter
inconveniens	Hertz	1927					N	N
inermis	Bell	1902	NHMUK 1901.5.10.87-90	Syntypes	Cape Adare, East Antarctica	Natural History Museum London	Y	Y	2024-08-20	Specimens	Hugh Carter
inflata	koehler	1897		Holotype	Colombo, Sri Lanka		N	N		Koehler 1897 Plate 9
inornata	Lyman	1878	NHMUK 82.12.23.209	Holotype	Challenger St 106 Equatorial Mid Atlantic Ridge 1° 47'N 24° 26'W	Natural History Museum London	Y	Y	2024-08-20	Specimens	Hugh Carter
intorta	Lyman	1878	NHMUK 82.12.23.335 (3 of 9)	syntypes	Challenger Marion Island	Natural History Museum London	Y	Y	2024-08-20	Specimens	Hugh Carter
madseni	Belyaev & Litvinova	1972			East Japan 38° 11'N 143 56'E (but check)		N	N		Belyaev & Litvenova 1972 Fig 4.
martensi	Studer	1885	E1790 (5 specimens)	syntypes	Royal Bay, South Georgia	Museum de Natur Hamburg - Zoologie	Y	N	2024-05-17	Images	Andreas Schmidt-Rhaesa
medusa	Lyman	1878	NHMUK 82.12.23.100 (1 specimen)	syntypes	Challenger St 156 East Antarctic	Natural History Museum London	Y	Y	2024-08-20	Specimens	Hugh Carter
mordax	Koehler	1922	MNHN IE 2013-10233	syntype	East Antarctic 63° 13'S 101 42'E	Muséum national d'Histoire naturelle - Paris	Y	N	2024-05-13	Images
olstadi	Madsen	1955	E669		Elephant Island, Antarctica	Natural History Museum, University of Oslo	Y	N	2024-11-11	Images	Torsten Struck
partita	Koehler	1908			South Orkney Island SE shelf		N	N		koehler 1908 Plate 10 fig94-95
pseudotesssellata	Martynove & Litvinova	2008	ZMBN 77852	Holotype	Mid Atlantic Ridge; north of Azores		N	N		Martynov & Litvinova 2008 Fig. 4 D
relegata	Koehler	1922	USNM E52406		Elephant Island, Antarctica	Smithsonian Institute NMNH	Y	N		Images
resistens	Koehler	1911			Cape Royds, Ross Sea, Antarctica	Muséum national d'Histoire naturelle - Paris	Y	N		Images
scissa	Koehler	1908	NHMUK 1912.11.11.22	Paraatype	East Weddell Sea, Antarctica	Natural History Museum London	Y	Y	2024-08-20	Specimens	Hugh Carter
scuta	Lyman	1883			St Vincent and Grenadines, West Indies					Lyman 1883 Plate 4 fig 28-30
tessellata	Verrill	1894	USNM 24735	Syntype	Eastern United States	Smithsonian Institute NMNH	Y	N		Images
tuberosa	Mortensen	1936	NHMUK 1936.12.30.1285-1286	Syntypes	Discovery, Bransfield Strait	Natural History Museum London	Y	Y	2024-08-20	Specimens	Hugh Carter
tumescens	Koehler	1922	2013-10232	Syntype	East Antarctic 60° 32'S 141° 39'E Abyssal	Muséum national d'Histoire naturelle - Paris	Y	N		Images
turgida	Mortensen	1936	NHMUK 1936.12.30.1266	Holotype	Patagonian Shelf, North of Cape Horn	Natural History Museum London	Y	Y	2024-08-20	Specimens	Hugh Carter
wallini	Mortensen	1925	USNM E44685		Bransfield Strait, Antarctica	Smithsonian Institute NMNH	Y	N		Images
